# Supplementary material for: Pyrroloquinoline quinone regulates glycolipid metabolism in the jejunum via inhibiting AMPK phosphorylation of weaned pigs
Source: Royal Society of Chemistry journal article supplement (doi:10.1039/d2fo00281g), 2022-01-01
Supplement: d2fo00281g1.pdf [file d2fo00281g1.pdf]

ARTICLE

**Supplemental Table 1** Primers used for qRT-PCR<sup>1</sup>

| Genes | Primer sequence (5' - 3') | Product size, bp | GenBank No.    |
|-------|---------------------------|------------------|----------------|
| TESK1 | F:TACCTGCGGACCCTGACTAC    | 128              | XM_003121984.4 |
|       | R:CATACTGCAGCAATGGATGG    |                  |                |
| CDA   | F:CTGCAGGCAAGTCATGAGAG    | 87               | NM_001244385.1 |
|       | R:TGGATGGTCTGACAACGTA     |                  |                |
| RP2   | F:AGGTCTGTCTTGGCTTTGG     | 120              | XM_003360282.4 |
|       | R:GGTGCTGTCTCCTTGCTTTC    |                  |                |
| TAF2  | F:GGAGATTACGGTGTGGTGCT    | 147              | XM_021090551.1 |
|       | R:TGGCCTCTGGAATTATGGTC    |                  |                |
| RIOK2 | F:AATTGTTCCCTGCAGTTTGG    | 109              | XM_021085153.1 |
|       | R:AGTTCGCTCCCAAGCTATGA    |                  |                |

TESK1, Dual specificity testis-specific protein kinase 1 isoform 1; CDA, Cytidine deaminase; RP2, Protein XRP2; TAF2, Transcription initiation factor TFIID 150 kDa subunit; RIOK2, Non-specific serine/threonine protein kinase.

**Supplemental Table 2** Primary antibodies for Western Blot

| Primary antibodies                                    | Company                   | Catalog number |
|-------------------------------------------------------|---------------------------|----------------|
| Anti-GST antibody [EPR4236]                           | abcam                     | Ab111947       |
| Beta Tubulin Rabbit Polyclonal antibody               | proteintech               | 10094-1-AP     |
| HSPA1L Rabbit Polyclonal antibody                     | proteintech               | 13970-1-AP     |
| HLA Class I ABC Monoclonal Antibody                   | proteintech               | 66013-1-Ig     |
| GLUT5 Polyclonal antibody                             | proteintech               | 27571-1-AP     |
| HLA DR/DP antibody (HL-38) (MHC class II antigen DRA) | novus biologicals         | NB500-406      |
| Phospho-AMPK $\alpha$ (Thr172) (40H9) Rabbit mAb      | Cell Signaling Technology | #2535          |
| AMPK $\alpha$ 1 antibody                              | Cell Signaling Technology | #2795          |
| GAPDH (14C10) Rabbit mAb                              | Cell Signaling Technology | #2118          |
| $\beta$ -Actin (13E5) Rabbit mAb                      | Cell Signaling Technology | #4970          |

Supplemental Table 3 Differential expressed proteins<sup>1</sup>

| Protein name                                                | Gene name | Protein ID in uniprot | PQQ           | CTRL         | Log <sub>2</sub> FC | Score | FDR   |
|-------------------------------------------------------------|-----------|-----------------------|---------------|--------------|---------------------|-------|-------|
| <b>Up-regulated proteins (10)</b>                           |           |                       |               |              |                     |       |       |
| Dual specificity testis-specific protein kinase 1 isoform 1 | TESK1     | F15G05                | 1836334028.0  | 3688778.6    | 8.959               | 0.463 | 0.287 |
| RING-type E3 ubiquitin transferase                          | MUL1      | I3LH19                | 51522325029.0 | 642779034.7  | 6.325               | 1.000 | 0.000 |
| Phosphatase tensin-type domain-containing protein           | TNS1      | K7GRG9                | 245488718.10  | 4564599.8    | 5.749               | 0.883 | 0.041 |
| MHC class I antigen                                         | SLA-2     | A0A2S1PUH7            | 13121864987.0 | 292615970.8  | 5.487               | 0.672 | 0.136 |
| Septin-5                                                    | SEPTIN5   | A0A286ZRX1            | 4507778494.0  | 105256600.8  | 5.42                | 0.436 | 0.311 |
| ADP ribosylation factor GTPase activating protein 1         | ARFGAP1   | A0A286ZJ05            | 261961332.4   | 6281263.1    | 5.382               | 0.794 | 0.073 |
| Lipocalin 2                                                 | LCN2      | F1RRX1                | 2238210083.0  | 120372094.7  | 4.217               | 0.978 | 0.007 |
| Cytidine deaminase                                          | CDA       | I3LAH9                | 1729440564.0  | 145670444.5  | 3.57                | 0.713 | 0.118 |
| Geranylgeranyl transferase type-2 subunit beta              | MSH4      | A0A287BJ15            | 453169555.4   | 39308629.0   | 3.527               | 0.965 | 0.013 |
| GRIP and coiled-coil domain containing 1                    | GCC1      | A0A287APX2            | 1641035917.0  | 146649838.6  | 3.484               | 0.998 | 0.001 |
| <b>Down-regulated proteins (10)</b>                         |           |                       |               |              |                     |       |       |
| Lysozyme C-3                                                | N/A       | P12069                | 58565652.3    | 1437499358.1 | -4.617              | 0.587 | 0.195 |
| Protein XRP2                                                | RP2       | I3L855                | 93768860.5    | 1223254842.8 | -3.705              | 0.781 | 0.083 |
| T-complex protein 1 subunit epsilon                         | CCT5      | L7PBE6                | 112720354.8   | 1207915200.1 | -3.422              | 0.968 | 0.010 |
| Transcription initiation factor TFIID 150 kDa subunit       | TAF2      | K7GP24                | 48062265.2    | 497391020.0  | -3.371              | 0.893 | 0.036 |
| AHNAK nucleoprotein                                         | AHNAK     | A0A286ZPY1            | 234774768.8   | 2279716880.2 | -3.28               | 0.967 | 0.011 |
| DNA repair protein complementing XP-C cells isoform 5       | XPC       | F1SPI2                | 168155648.7   | 1553562655.6 | -3.208              | 0.562 | 0.211 |
| DNA topoisomerase II binding protein 1                      | TOPBP1    | A0A287BSI9            | 557144557.1   | 5009732207.6 | -3.169              | 0.992 | 0.002 |
| Charged multivesicular body protein 2B                      | CHMP2B    | F2Z5Q1                | 511645608.7   | 4445774113.1 | -3.119              | 0.455 | 0.293 |
| Non-specific serine/threonine protein kinase                | RIOK2     | A0A287B798            | 198680280.1   | 1580008420.4 | -2.991              | 0.893 | 0.035 |
| Nestin                                                      | NES       | I3LNY6                | 359488520.8   | 2639655022.8 | -2.876              | 0.388 | 0.345 |

<sup>1</sup> PQQ and CTRL, the average relative abundance of proteins in two groups of samples after normalization. Log<sub>2</sub>FC, log<sub>2</sub>(PQQ/ CTRL) value of the multiple of the difference between the two groups. Scores, the posterior probability of the Bayesian model and the larger value means more significant difference of the protein. FDR, the false discovery rate and the smaller value means more significant difference of the protein.

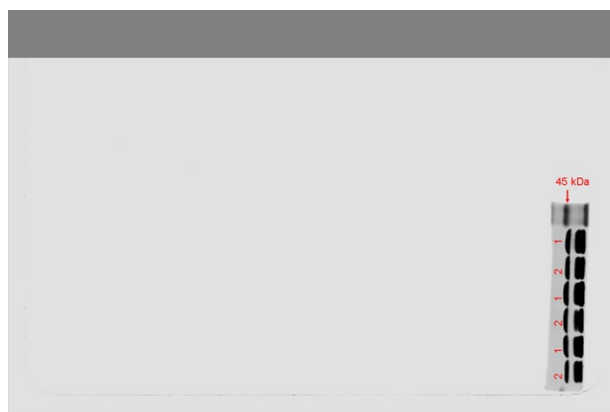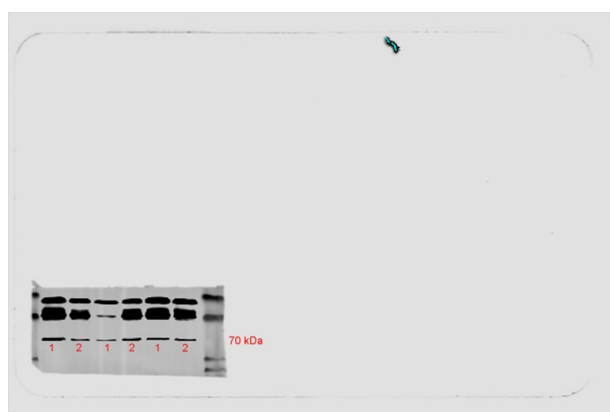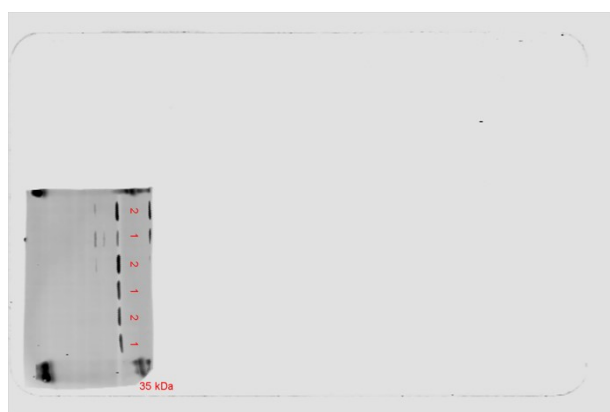

Supplementary Figure 1. Gel membrane and protein band of  $\beta$ -actin (45kDa) as the loading control for Tublin and GST. 1 means CTRL group; 2 means PQQ group.

Supplementary Figure 2. Gel membrane and protein band of Tublin (55kDa). 1 means CTRL group; 2 means PQQ group.

Supplementary Figure 3. Gel membrane and protein band of GST (26kDa). 1 means CTRL group; 2 means PQQ group.

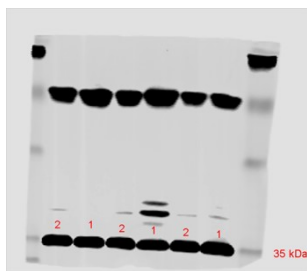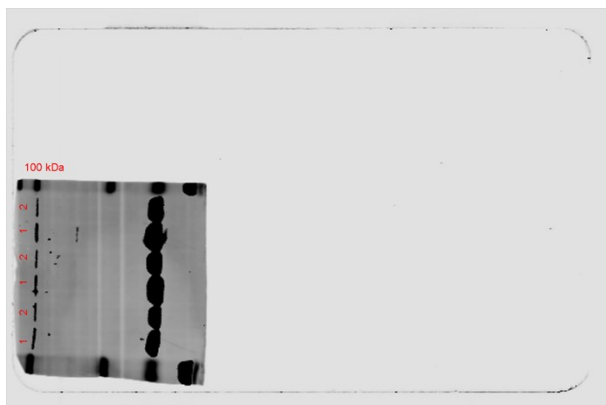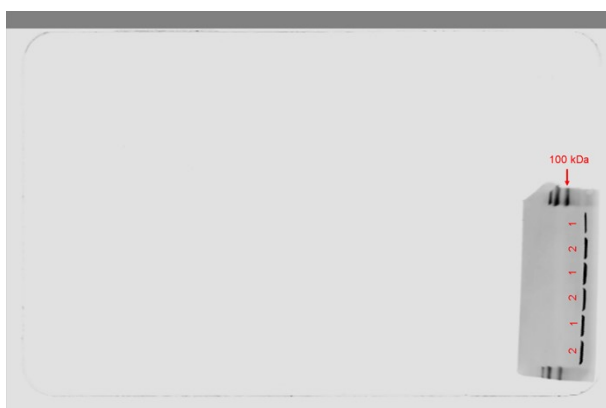

Supplementary Figure 4. Gel membrane and protein band of GAPDH (35kDa) as the loading control for MHC II and HSP. 1 means CTRL group; 2 means PQQ group.

Supplementary Figure 5. Gel membrane and protein band of MHC II (100kDa). 1 means CTRL group; 2 means PQQ group.

Supplementary Figure 6. Gel membrane and protein band of HSP (70kDa). 1 means CTRL group; 2 means PQQ group.

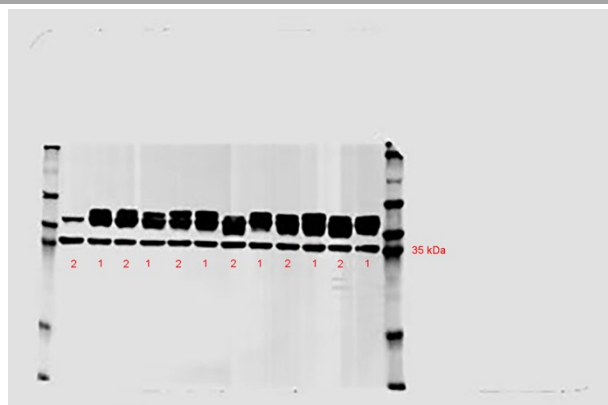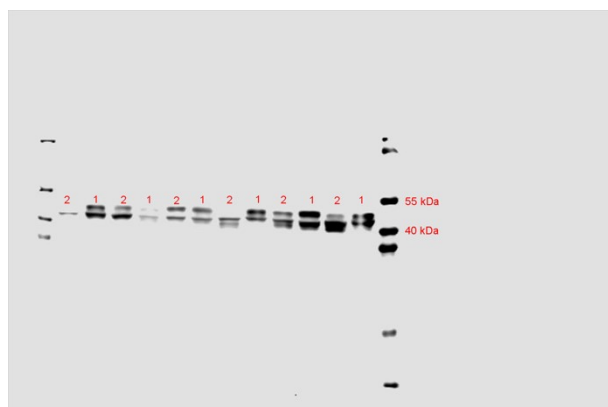

Supplementary Figure 7. Gel membrane and protein band of GAPDH (35kDa) as the loading control for MHC I. 1 means CTRL group; 2 means PQQ group.

Supplementary Figure 8. Gel membrane and protein band of MHC I (41kDa). 1 means CTRL group; 2 means PQQ group.

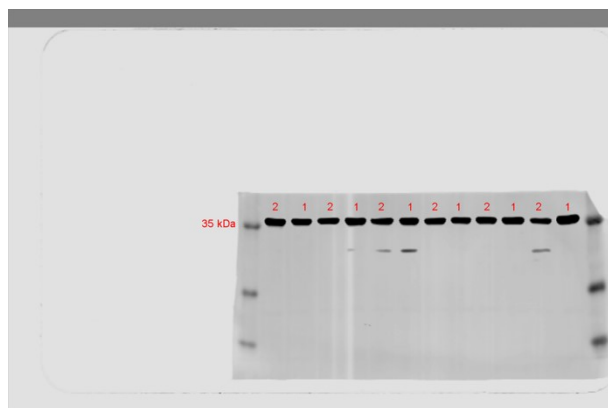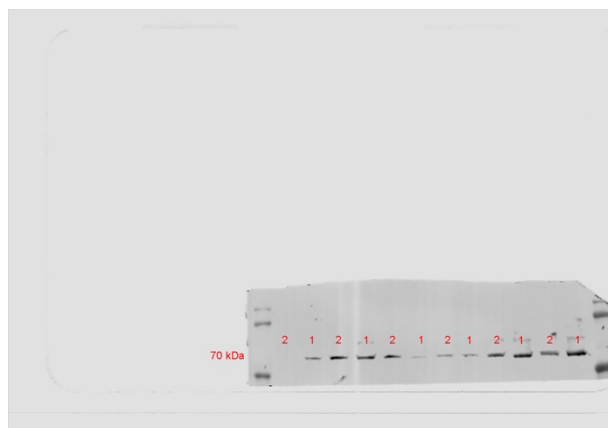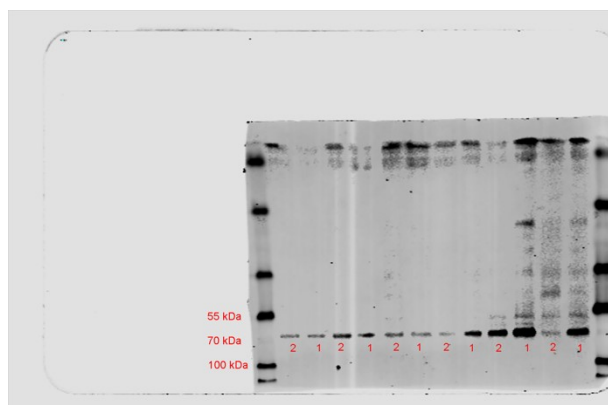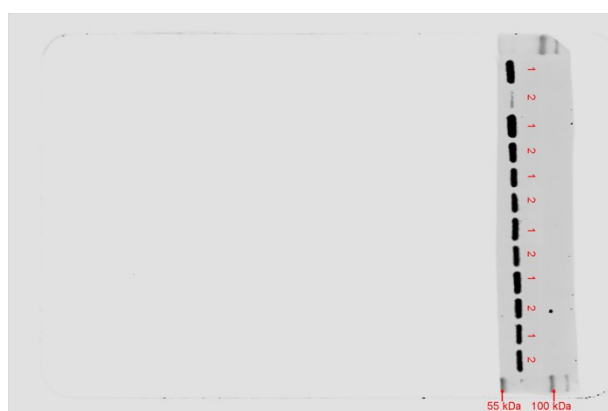

Supplementary Figure 9. Gel membrane and protein band of GAPDH (36kDa) as the loading control of GLUT5, p-AMPK and AMPK. 1 means CTRL group; 2 means PQQ group.

Supplementary Figure 10. Gel membrane and protein band of GLUT5 (70kDa). 1 means CTRL group; 2 means PQQ group.

Supplementary Figure 11. Gel membrane and protein band of p-AMPK (62kDa). 1 means CTRL group; 2 means PQQ group.

Supplementary Figure 12. Gel membrane and protein band of AMPK (62kDa). 1 means CTRL group; 2 means PQQ group



## Statistics of KEGG Pathway Enrichment

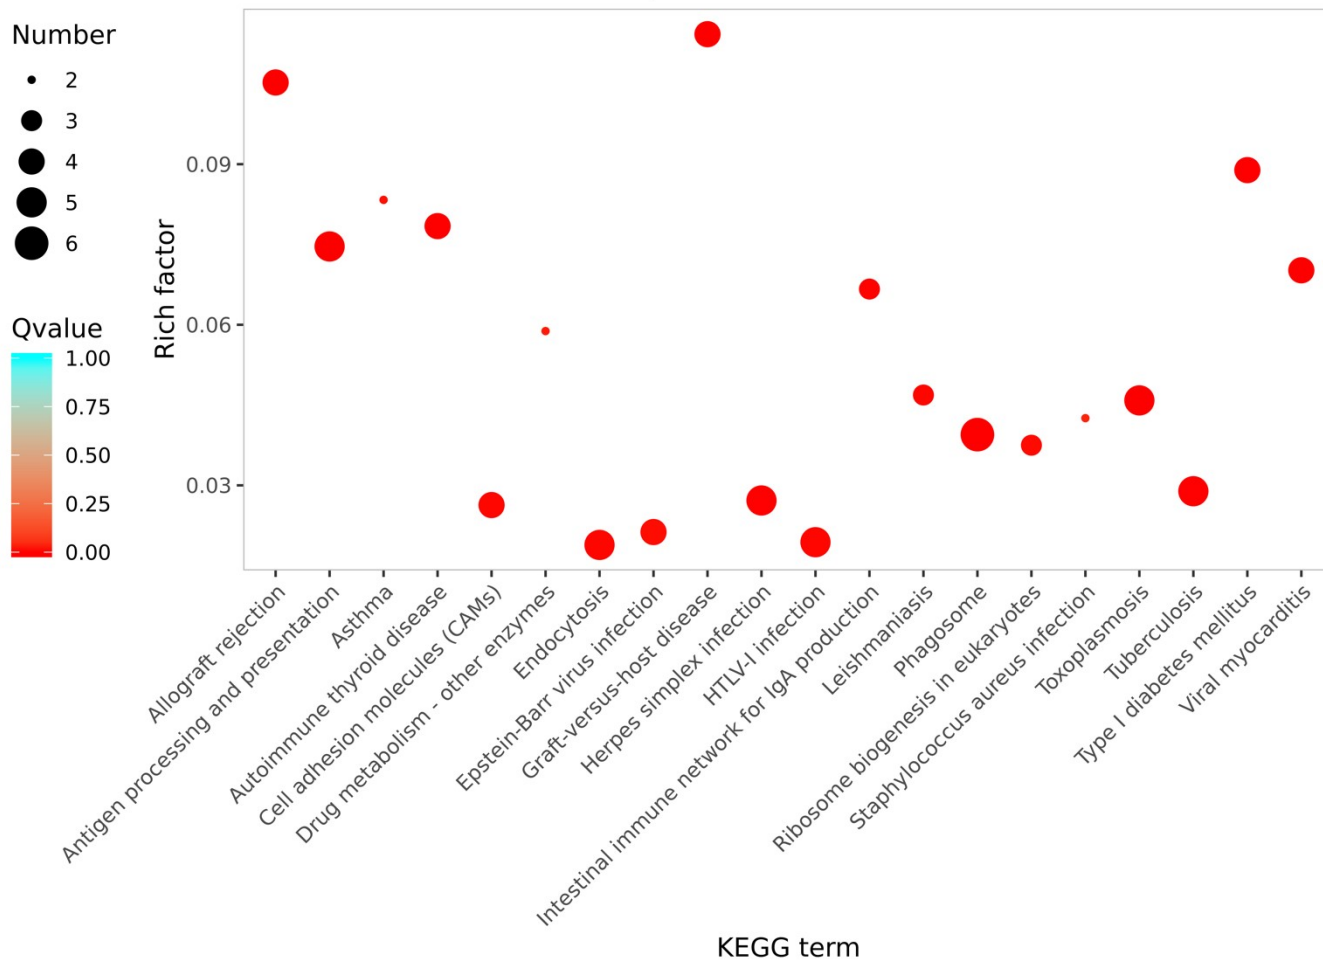

Supplementary Figure 13. The statistics of KEGG pathway enrichment
